# Supplementary material for: Fluorescent protein tagging as a tool to define the subcellular distribution of proteins in plants
Source: Front Plant Sci. 2013 Jun 24;4:214. doi: 10.3389/fpls.2013.00214 (PMC3690342; doi:10.3389/fpls.2013.00214)
Supplement: Supplementary file 1 [file DataSheet1.XLSX]

## Sheet: Sheet1
Suppl. Table 1: List of proteins derived from SUBA3 that are claimed to be localized to the plastid, mitochondrion, or peroxisome by FP tagging and for which a disagreement between FP tagging and MS data has been observed. Colouring indicates dual-targeted or dynamic proteins where FP and MS data partially agree (yellow), and technical issues with the FP tagging approach (green) or the MS approac…
	Gene	Description	Location FP tagging	Location MS	Curated Location
Plastid	AT1G50200.1	Alanyl-tRNA synthetase;	plastid:16251277;mitochondrion:16251277	cytosol:21166475	plastid, mitochondrion, cytosol
	AT1G55920.1	serine acetyltransferase 2;1;Encodes a chloroplast/cytosol localized serine O-acetyltransferase involved in sulfur assimilation and cysteine biosynthesis. Expressed in the vascular system.	plastid:9830017	nucleus:14617066	?
	AT1G68220.1	Protein of unknown function (DUF1218);	plastid:21515817;endoplasmic reticulum:21515817	plasma membrane:17317660	?
	AT2G02510.1*	NADH dehydrogenase (ubiquinone)s;	plastid:19283443;mitochondrion:19283443;peroxisome:19283443	mitochondrion:21841088;mitochondrion:20197505;mitochondrion:18189341;mitochondrion:15276431	mitochondrion
	AT2G03880.1	Pentatricopeptide repeat (PPR) superfamily protein;	plastid:15269332	plasma membrane:15574830	plastid
	AT2G16570.1	GLN phosphoribosyl pyrophosphate amidotransferase 1;Amidophosphoribosyltransferase (ATase: EC 2.4.2.14) is a key enzyme in the pathway of purine nucleotide biosynthesis	plastid:21908688	cytosol:21166475;mitochondrion:21841088	?
	AT2G24120.1	DNA/RNA polymerases superfamily protein;	plastid:10205908	mitochondrion:14671022	?
	AT2G27080.1	Late embryogenesis abundant (LEA) hydroxyproline-rich glycoprotein family;	plastid:15141064;unclear:10737809	plasma membrane:20843791	?
	AT2G31530.1	SecY protein transport family protein;Encodes a component of the thylakoid-localized Sec system involved in the translocation of cytoplasmic proteins into plastid. Loss-of-function mutations result in arrest at the globular stage and embryo lethality.	plastid:21051552	plasma membrane:19334764	plastid
	AT2G35010.1	thioredoxin O1;	plastid:12707279	mitochondrion:21472856	?
	AT2G35605.1*	SWIB/MDM2 domain superfamily protein;	plastid:22797472;mitochondrion:22797472	mitochondrion:21472856	plastid, mitochondrion
	AT2G39140.1	pseudouridine synthase family protein;Suppressor of var2 variegation phenotype. Chloroplast localized. Loss of function mutant has defects in chloroplast protein translation and rRNA processing. Similar in sequence to pseudouridine synthase proteins.	plastid:18599582	plasma membrane:19334764	plastid
	AT3G03380.1	DegP protease 7;Encodes a putative DegP protease.	plastid:20089771;mitochondrion:cpeb-tanz;nucleus:cpeb-tanz	cytosol:21166475	plastid, nucleus
	AT3G03590.1	SWIB/MDM2 domain superfamily protein;	plastid:22797472	mitochondrion:21841088	?
	AT3G10620.1	nudix hydrolase homolog 26;	plastid:18815383	plasma membrane:22318864	?
	AT3G19680.1	Protein of unknown function (DUF1005);	plastid:21908688	plasma membrane:17317660	?
	AT3G19720.1	P-loop containing nucleoside triphosphate hydrolases superfamily protein;Encodes a novel chloroplast division protein. Mutants of exhibit defects in chloroplast constriction, have enlarged, dumbbell-shaped chloroplasts. The ARC5 gene product shares similarity with the dynamin family of GTPases, which mediate endocytosis, mitochondrial division, and other organellar fission and fusion events in eu…	plastid:12642673	plasma membrane:21433285	plastid
	AT3G27190.1	uridine kinase-like 2;One of the homologous genes predicted to encode proteins with UPRT domains (Uracil phosphoribosyltransferase). Five of these genes (At5g40870, At3g27190, At1g55810, At4g26510 and At3g27440) show a high level of identity, and are annotated as also containing a N-terminal uracil kinase (UK) domain. These genes are referred to as UKL1 (UK-like 1), UKL2, UKL3, UKL4 and UKL5, res…	plastid:21828290	cytosol:21166475	?
	AT3G49310.1	Major facilitator superfamily protein;	plastid:21515817;endoplasmic reticulum:21515817	golgi:22430844	?
	AT3G56490.1*	HIS triad family protein 3;Encodes a protein that has adenylylsulfate sulfohydrolase activity (E.C. 3.6.2.1) in vitro.	plastid:19329564;peroxisome:19329564	peroxisome:19329564;plasma membrane:17644812	plastid, peroxisome
	AT3G57430.1	Tetratricopeptide repeat (TPR)-like superfamily protein;Encodes a chloroplast RNA editing factor.	plastid:cpeb-tanz	plasma membrane:22318864	plastid
	AT4G14310.1	Transducin/WD40 repeat-like superfamily protein;	plastid:cpeb-tanz	extracellular:15593128	?
	AT4G16160.2	Mitochondrial import inner membrane translocase subunit Tim17/Tim22/Tim23 family protein;Homologous to pea OEP16 and barley pPORA (OEP16), a member of Arabidopsis OEP16 family. Two OEP16 genes are closely related to each other and are conserved in all land plants, OEP16-2, also named OEP16-S, and OEP16-1 (renamed OEP16-L) are result of the gene duplication event that occurred prior to divergence …	plastid:17098851	cytosol:22522809	plastid
	AT4G33650.1	dynamin-related protein 3A;Encodes a protein with high sequence similarity to the dynamin superfamily. Among those members ADL2 was most closely related to Dnm1p of yeast and likely a member of the Vps1p subfamily. Widely expressed in various tissues with highest expression in flower tissues. Localizes to the chloroplast, mitochondrion and peroxisome. Involved in peroxisome and mitochondria fissi…	plastid:9747851;cytosol:18559960;mitochondrion:15086806;mitochondrion:14988495;peroxisome:15086806	plasma membrane:19334764	dynamic
	AT5G01410.1*	Aldolase-type TIM barrel family protein;Encodes a protein predicted to function in tandem with PDX2 to form glutamine amidotransferase complex with involved in vitamin B6 biosynthesis.	plastid:16236150;cytosol:16236150;cytosol:16157873;nucleus:16236150;plasma membrane:16236150	cytosol:21166475	?
	AT5G03800.1	Pentatricopeptide repeat (PPR) superfamily protein;Encodes a protein with a large central domain of 14 internal pentatricopeptide motifs (some degenerate) arranged in tandem. Mutations in this locus result in embryo lethality.	plastid:cpeb-tanz;mitochondrion:cpeb-tanz	plasma membrane:20843791	plastid, mitochondrion
	AT5G05980.1*	DHFS-FPGS homolog B;	plastid:21502816;cytosol:21502816	cytosol:21166475	?
	AT5G20070.1	nudix hydrolase homolog 19;	plastid:18815383	cytosol:21166475	?
	AT5G25900.1	GA requiring 3;Encodes a member of the CYP701A cytochrome p450 family that is involved in later steps of the gibberellin biosynthetic pathway.	plastid:11722763	endoplasmic reticulum:16618929	?
	AT5G26860.1*	lon protease 1;Encodes a member of the Lon protease-like proteins (Lon1/At5g26860, Lon2/At5g47040, Lon3/At3g05780, Lon4/At3g05790). Lon is a multifunctional ATP-dependent protease which exists in bacteria, archaea and within organelles in eukaryotic cells. Lon proteases are responsible for the degradation of abnormal, damaged and unstable proteins.	plastid:cpeb-tanz; plastid:22023720;mitochondrion:19076295;mitochondrion:17478548	mitochondrion:21841088;mitochondrion:19688752;mitochondrion:17137349;mitochondrion:14671022;mitochondrion:21472856;plasma membrane:21433285	plastid, mitochondrion
	AT5G40870.1	uridine kinase/uracil phosphoribosyltransferase 1;Encodes a protein that appears to possess both uridine kinase and uracil phosphoribosyltransferase activities.	plastid:21828290	cytosol:21166475	?
	AT5G42080.1*	dynamin-like protein;Encodes a dynamin-like protein related to phragmoplastin. Mutations in this gene, in combination with mutation in ADL1E, result in defects in embryogenesis, cell plate formation and trichome branching. Also controls vascular patterning in combination with VAN3 and GNOM. DRP2B and DRP1A participate together in clathrin-coated vesicle formation during endocytosis.	plastid:9463364;cytoskeleton:14750520;cytosol:18612642;plasma membrane:20231465;plasma membrane:12671086	cytosol:21166475;plasma membrane:22318864;plasma membrane:22215637;plasma membrane:21433285;plasma membrane:19334764;plasma membrane:17317660;plasma membrane:16618929;vacuole:17151019;vacuole:15539469	dynamic
	AT5G55200.1*	Co-chaperone GrpE family protein;	plastid:19995732;mitochondrion:19995732	mitochondrion:18385124;mitochondrion:17137349;mitochondrion:14671022;mitochondrion:21472856	plastid, mitochondrion
	AT5G66950.1	Pyridoxal phosphate (PLP)-dependent transferases superfamily protein;	plastid:21908688	plasma membrane:19334764;plasma membrane:17317660	?
Mitochondrion	AT1G11870.1*	Seryl-tRNA synthetase;Seryl-tRNA synthetase targeted to chloroplasts and mitochondria. Its inactivation causes developmental arrest of chloroplasts and mitochondria in Nicotiana benthamiana.	mitochondrion:16251277;mitochondrion:16107332;plastid:16251277;plastid:16107332	plastid:21531424;plastid:20423899;plastid:20061580;plastid:18431481	mitochondrion, plastid
	AT1G13900.1*	Purple acid phosphatases superfamily protein;	mitochondrion:22751362;plastid:22751362	plastid:15028209	?
	AT1G14610.1*	valyl-tRNA synthetase / valine--tRNA ligase (VALRS);Required for proper proliferation of basal cells.	mitochondrion:10583378;cytosol:10583378	cytosol:21166475	mitochondrion, cytosol
	AT1G14830.1*	DYNAMIN-like 1C;Encodes a dynamin-like protein that is involved in mitochondrial morphogenesis and pollen development. Protein is localized as speckles in the cytoplasm, partially co-localizes with mitochondrial markers, cell plate of dividing cells, and the tip of root hairs, root cap cells, and expanding part of trichoblasts.	mitochondrion:14523248;cytoskeleton:14750520;cytosol:18502847;cytosol:14750520;plasma membrane:18502847	plasma membrane:22215637;plasma membrane:21433285;plasma membrane:20843791;plasma membrane:19334764;plasma membrane:17317660;plasma membrane:16618929;vacuole:15215502	dynamic
	AT1G25380.1	NAD+ transporter 2;Encodes a mitochondrial-localized NAD+ transporter that transports NAD+ in a counter exchange mode with ADP and AMP in vitro.	mitochondrion:19745225	plasma membrane:19334764	mitochondrion
	AT1G29880.1*	glycyl-tRNA synthetase / glycine--tRNA ligase;	mitochondrion:11278923;cytosol:11278923	cytosol:21166475;plasma membrane:22215637;plasma membrane:19334764	mitochondrion, cytosol
	AT1G48420.1*	D-cysteine desulfhydrase;Encodes an enzyme that decomposes D-cysteine into pyruvate, H2S, and NH3. Only D-cysteine but not L-cysteine was converted by D-CDes to pyruvate, H2S, and NH3. There is conflicting evidence on its 1-aminocyclopropane-1-carboxylate deaminase activity. Involved in regulating ethylene levels.	mitochondrion:15720402;cytosol:15720402	cytosol:21166475;plastid:20423899;plastid:20061580;plastid:18431481;plastid:15028209	?
	AT1G49630.1*	presequence protease 2;Zinc metalloprotease pitrilysin subfamily A. Signal peptide degrading enzyme targeted to mitochondria and chloroplasts. Expressed in flower, leaf and root. Not expressed in silique and shoot.	mitochondrion:15827031;plastid:15827031	plasma membrane:21433285;plastid:18431481	mitochondrion, plastid
	AT1G50200.1	Alanyl-tRNA synthetase;	mitochondrion:16251277;plastid:16251277	cytosol:21166475	mitochondrion, plastid
	AT1G78620.1*	Protein of unknown function DUF92, transmembrane;	mitochondrion:19224954;plastid:19224954	plastid:20061580;plastid:18431481	?
	AT2G04842.1*	threonyl-tRNA synthetase, putative / threonine--tRNA ligase, putative;Encodes a dual localized threonyl-tRNA synthetase found both in the mitochondrion and the chloroplast. Plants mutated in this gene terminate as embryos in the globular stage.	mitochondrion:19733576;mitochondrion:16251277;plastid:19733576;plastid:16251277	plastid:21531424;plastid:20423899;plastid:20061580;plastid:18633119;plastid:18431481	mitochondrion, plastid
	AT2G14120.1*	dynamin related protein;Encodes a dynamin related protein. DRPs are self-assembling GTPasse involved in fission and fusion of membranes. DRP3B functions in mitochondrion and peroxisome fission in combination with DRP3A.	mitochondrion:14988495;cytosol:18559960	cytosol:21166475;plasma membrane:21433285;plasma membrane:19334764;plasma membrane:17644812;plasma membrane:17317660	dynamic
	AT2G16530.1	3-oxo-5-alpha-steroid 4-dehydrogenase family protein;	mitochondrion:12837943;cytosol:15141064;nucleus:15141064	endoplasmic reticulum:16618929;golgi:22430844	?
	AT2G25840.1*	Nucleotidylyl transferase superfamily protein;	mitochondrion:16251277;plastid:16251277	plastid:21531424;plastid:20061580;plastid:18431481;plastid:15028209	mitochondrion, plastid
	AT2G39290.1*	phosphatidylglycerolphosphate synthase 1;Encodes a phosphatidylglycerolphosphate synthase 2C which is dual-targeted into chloroplasts and mitochondria. Mutant plants have mutant chloroplasts but normal mitochondria.	mitochondrion:12609031;plastid:12609031	plastid:20061580;plastid:18431481;plastid:12766230	mitochondrion, plastid
	AT3G02660.1*	Tyrosyl-tRNA synthetase, class Ib, bacterial/mitochondrial;	mitochondrion:19733576;mitochondrion:16251277;plastid:19733576;plastid:16251277	plastid:21531424;plastid:20423899;plastid:20061580;plastid:18431481	mitochondrion, plastid
	AT3G03380.1	DegP protease 7;Encodes a putative DegP protease.	mitochondrion:cpeb-tanz;nucleus:cpeb-tanz;plastid:20089771	cytosol:21166475	plastid, nucleus
	AT3G13490.1*	Lysyl-tRNA synthetase, class II;Encodes a dual targeted lysyl-tRNA ligase that is found both in the mitochondrion and the chloroplast. Plants mutated in this gene exhibit an ovule abortion phenotype.	mitochondrion:19733576;mitochondrion:16251277;plastid:19733576;plastid:16251277	plastid:21531424;plastid:20061580;plastid:18431481	mitochondrion, plastid
	AT3G16540.1	DegP protease 11;Encodes a putative DegP protease.	mitochondrion:cpeb-tanz	plastid:14729914	?
	AT3G17970.1*	translocon at the outer membrane of chloroplasts 64-III;Integral chloroplast outer membrane protein.	mitochondrion:12954611;plastid:21515817;plastid:14741350	plasma membrane:21433285;plasma membrane:19334764;plastid:20061580;plastid:18431481;plastid:12766230	plastid
	AT3G19170.1*	presequence protease 1;Zinc metalloprotease pitrilysin subfamily A. Signal peptide degrading enzyme targeted to mitochondria and chloroplasts. Expressed only in siliques and flowers	mitochondrion:14578924;plastid:14578924	plastid:21531424;plastid:20423899;plastid:20061580;plastid:18633119;plastid:18431481;plastid:16207701;plastid:15028209;plastid:12938931	mitochondrion, plastid
	AT3G47450.1	P-loop containing nucleoside triphosphate hydrolases superfamily protein;Encodes a protein with similarity to the bacterial YqeH GTPase required for proper ribosome assembly. In Arabidopsis, mutant analyses show that this protein regulates growth and hormonal signaling in plants. It also attenuates oxidative stress and reactive oxygen species (ROS). It also seems to be involved in regulating leaf…	mitochondrion:16272429	plastid:20423899;plastid:18431481	plastid
	AT3G48110.1*	glycine-tRNA ligases;glycine-tRNA ligase	mitochondrion:11278923;plastid:11278923	plastid:21531424;plastid:20423899;plastid:20061580;plastid:18633119;plastid:18431481;plastid:16207701;plastid:15028209	mitochondrion, plastid
	AT3G55640.1	Mitochondrial substrate carrier family protein;	mitochondrion:19036033;peroxisome:19036033	plasma membrane:15308754;plasma membrane:14506206	mitochondrion, peroxisome
	AT3G57090.1*	Tetratricopeptide repeat (TPR)-like superfamily protein;Encodes a protein with similarity to yeast FIS proteins. These membrane anchored proteins bind DRP proteins and function during organelle division. FIS1B is expressed ubiquitously and appears to be involved in peroxisome division.	mitochondrion:16545471;peroxisome:16545471;plastid:16545471	plastid:20061580;plastid:18431481	?
	AT3G58160.1	P-loop containing nucleoside triphosphate hydrolases superfamily protein;Class XI myosin gene expressed in flowers from 4-6 week old plants and leaves from 3 week old plants	mitochondrion:17288617;cytosol:19369591;golgi:17288617	plastid:20061580;vacuole:15539469	dynamic
	AT3G60190.1	DYNAMIN-like 1E;At3g60190 encodes Arabidopsis dynamin-related protein 1E, DRP1E, also known as EDR3, ADL4 and ADL1E, which is 624 amino acid residues long, has a predicted mass of 69.8 kDa and a pI of 7.5. Dynamin-related protein 1E belongs to a plant-specific subclass of dynamin-related proteins (DRP1), consisting of five members in Arabidopsis (A, B, C, D, E). This class is characterized by hav…	mitochondrion:16824181;mitochondrion:14523248;cytosol:14750520	plasma membrane:22215637;plasma membrane:21433285;plasma membrane:19334764;plasma membrane:17317660;plasma membrane:16618929;vacuole:17151019;vacuole:15539469	dynamic
	AT4G04320.1*	malonyl-CoA decarboxylase family protein;	mitochondrion:19036033;peroxisome:19329564;peroxisome:19036033	peroxisome:19329564;peroxisome:18931141	mitochondrion, peroxisome
	AT4G16695.1	;	mitochondrion:21515817;endoplasmic reticulum:21515817	golgi:22430844	?
	AT4G28220.1	NAD(P)H dehydrogenase B1;	mitochondrion:18703057;mitochondrion:12972666;peroxisome:18703057	plasma membrane:19334764	mitochondrion, peroxisome
	AT4G31210.1*	DNA topoisomerase, type IA, core;	mitochondrion:19036033;plastid:19036033	plastid:20423899	mitochondrion, plastid
	AT4G32400.1*	Mitochondrial substrate carrier family protein;Encodes a plastidial nucleotide uniport carrier protein required to export newly synthesized adenylates into the cytosol.	mitochondrion:21330298;plastid:21330298	plasma membrane:19334764;plastid:20061580;plastid:18431481;unclear:16618929	plastid
	AT4G33650.1	dynamin-related protein 3A;Encodes a protein with high sequence similarity to the dynamin superfamily. Among those members ADL2 was most closely related to Dnm1p of yeast and likely a member of the Vps1p subfamily. Widely expressed in various tissues with highest expression in flower tissues. Localizes to the chloroplast, mitochondrion and peroxisome. Involved in peroxisome and mitochondria fissi…	mitochondrion:15086806;mitochondrion:14988495;cytosol:18559960;peroxisome:15086806;plastid:9747851	plasma membrane:19334764	dynamic
	AT4G33760.1*	tRNA synthetase class II (D, K and N) family protein;	mitochondrion:19733576;mitochondrion:16251277;plastid:19733576;plastid:16251277	plastid:21531424;plastid:20423899;plastid:20061580;plastid:18431481	mitochondrion, plastid
	AT4G37040.1*	methionine aminopeptidase 1D;encodes a methionine aminopeptidase	mitochondrion:11060042;plastid:11060042	plastid:21531424;plastid:18431481	?
	AT5G03455.1	Rhodanese/Cell cycle control phosphatase superfamily protein;Encodes a homolog of yeast cell cycle regulator CDC25. It has a sole catalytic domain and devoid of the N-terminal regulatory region found in the human CDC25 and is capable of reducing the mitotic cell length of transformed fission yeast. Non-plant CDC25 proteins have been shown to do this. However, the gene is more or less constant, re…	mitochondrion:21908688	plastid:18431481	?
	AT5G03800.1	Pentatricopeptide repeat (PPR) superfamily protein;Encodes a protein with a large central domain of 14 internal pentatricopeptide motifs (some degenerate) arranged in tandem. Mutations in this locus result in embryo lethality.	mitochondrion:cpeb-tanz;plastid:cpeb-tanz	plasma membrane:20843791	mitochondrion, plastid
	AT5G04140.1*	glutamate synthase 1;Encodes a gene whose sequence is similar to ferredoxin dependent glutamate synthase (Fd-GOGAT). Expression in leaves is induced by light and sucrose. Proposed to be involved in photorespiration and nitrogen assimilation.	mitochondrion:19223513;plastid:19223513	plastid:21531424;plastid:20423899;plastid:20061580;plastid:18633119;plastid:18431481;plastid:16207701;plastid:15028209;plastid:12938931	plastid
	AT5G05570.1	transducin family protein / WD-40 repeat family protein;	mitochondrion:12837943	plasma membrane:17317660;plastid:20061580	?
	AT5G08740.1*	NAD(P)H dehydrogenase C1;	mitochondrion:19036033;mitochondrion:18703057;mitochondrion:12972666;plastid:19036033;plastid:18703057	extracellular:15593128;plastid:22274653;plastid:21531424;plastid:20061580;plastid:18431481;plastid:16461379;plastid:16414959	mitochondrion, plastid
	AT5G14660.1*	peptide deformylase 1B;Encodes a peptide deformylase PDF1B. The crystal structure has been determined at a resolution of 0.24 nm (Biochem J, 2008, vol 413:417-427).	mitochondrion:http://dx.doi.org/10.1016/S0168-9452(03)00236-X;mitochondrion:11060042;plastid:http://dx.doi.org/10.1016/S0168-9452(03)00236-X;plastid:11060042	plastid:21531424;plastid:20423899;plastid:20061580;plastid:18431481	?
	AT5G14770.1	Tetratricopeptide repeat (TPR)-like superfamily protein;	mitochondrion:15269332	plasma membrane:22318864	?
	AT5G16715.1*	ATP binding;valine-tRNA ligases;aminoacyl-tRNA ligases;nucleotide binding;ATP binding;aminoacyl-tRNA ligases;	mitochondrion:19733576;mitochondrion:16251277;plastid:19733576	plasma membrane:19334764;plastid:20423899;plastid:20061580;plastid:18633119;plastid:18431481;plastid:15028209	mitochondrion, plastid
	AT5G22800.1*	Alanyl-tRNA synthetase, class IIc;A locus involved in embryogenesis. Mutations in this locus result in embryo lethality.	mitochondrion:16251277;plastid:16251277	plastid:21531424;plastid:20423899;plastid:20061580;plastid:18633119;plastid:18431481	mitochondrion, plastid
	AT5G23040.1*	Protein of unknown function (DUF3353);Cell growth defect factor 1.Causes Bax mediated lethality in yeast by generating reactive oxygen species and this effect is suppressed by AtBI-1.	mitochondrion:16192270;plastid:19224954	plastid:20061580;plastid:18431481;plastid:12938931	?
	AT5G24650.1	Mitochondrial import inner membrane translocase subunit Tim17/Tim22/Tim23 family protein;	mitochondrion:17098851	plasma membrane:19334764;plasma membrane:15060130;plastid:21531424;plastid:20061580;plastid:18431481;plastid:12938931;plastid:12766230;vacuole:17151019;vacuole:14760709	mitochondrion
	AT5G26830.1*	Threonyl-tRNA synthetase;Encodes a dual-targeted threonyl-tRNA synthetase found in both the chloroplast and mitochondrion.	mitochondrion:12837943;mitochondrion:10583378;cytosol:10583378	cytosol:21166475;plasma membrane:21433285;plasma membrane:17317660	mitochondrion, plastid
	AT5G35630.1*	glutamine synthetase 2;chloroplastic glutamine synthetase	mitochondrion:15273293;plastid:15273293	plasma membrane:22215637;plasma membrane:19334764;plastid:21539947;plastid:21531424;plastid:20423899;plastid:20061580;plastid:18633119;plastid:18431481;plastid:16648217;plastid:16207701;plastid:15322131;plastid:15028209;plastid:12938931	plastid
	AT5G49030.1*	tRNA synthetase class I (I, L, M and V) family protein;	mitochondrion:19733576;plastid:19733576;plastid:16251277	plastid:21531424;plastid:20061580;plastid:18431481;plastid:15028209	mitochondrion, plastid
	AT5G51020.1*	crumpled leaf;Encodes CRL (CRUMPLED LEAF), a protein localized in the outer envelope membrane of plastids. Mutation in this gene affects the pattern of cell division, cell differentiation and plastid division.	mitochondrion:21515817;plastid:22014227;plastid:15086805	plastid:20061580	plastid
	AT5G52970.1*	thylakoid lumen 15.0 kDa protein;	mitochondrion:19224954;plastid:19224954	plastid:21531424;plastid:20423899;plastid:20061580;plastid:18431481;plastid:16648217;plastid:15028209;plastid:14729914;plastid:11826309;plastid:11719511	plastid
	AT5G54770.1*	thiazole biosynthetic enzyme, chloroplast (ARA6) (THI1) (THI4);Encodes a thiamine biosynthetic gene that has a dual function in thiamine biosynthesis and mitochondrial DNA damage tolerance. It appears to be involved in producing the thiazole portion of thiamine (vitamin B1). A crystal structure of the protein reveals that it forms a 2-ring homo-octamer.	mitochondrion:12482914;plastid:12482914	plastid:21531424;plastid:20423899;plastid:20061580;plastid:18633119;plastid:18431481;plastid:16923014;plastid:16648217;plastid:16207701;plastid:12938931	mitochondrion, plastid
	AT5G63980.1*	Inositol monophosphatase family protein;Encodes a bifunctional protein that has 3'(2'),5'-bisphosphate nucleotidase and inositol polyphosphate 1-phosphatase activities and rescues sulfur assimilation mutants in yeast. It is involved in the response to cold, drought (negative regulator of drought tolerance), and ABA. Mutants in this gene exhibit enhanced induction of stress genes in response to co…	mitochondrion:22128124;plastid:22128124	cytosol:21166475;plastid:21531424;plastid:20423899;plastid:20061580;plastid:16207701	mitochondrion, plastid
	AT5G64050.1*	glutamate tRNA synthetase;Glutamate-tRNA ligase. Targeted to mitochondria and chloroplast. Its inactivation causes developmental arrest of chloroplasts and mitochondria in Nicotiana benthamiana.	mitochondrion:16251277;mitochondrion:16107332;plastid:16251277;plastid:16107332	plastid:20423899;plastid:20061580;plastid:18431481	mitochondrion, plastid
Peroxisome	AT1G17580.1	myosin 1;Encodes a member of the type XI myosin protein family involved in organelle trafficking and overall plant development.	peroxisome:17500056;golgi:17500056	plasma membrane:19334764;plastid:20061580	dynamic
	AT1G27950.1	glycosylphosphatidylinositol-anchored lipid protein transfer 1;Encodes LTPG1, a lipid transfer protein with a predicted GPI (glycosylphosphatidylinositol)-anchor domain. Localized in the plasma membrane. Disruption of the LTPG1 gene causes alterations of cuticular lipid composition, but no significant changes on total wax and cutin monomer loads are seen.	peroxisome:10737809;unclear:10737809	extracellular:21109274;extracellular:16356755;plasma membrane:22215637;plasma membrane:17644812;plasma membrane:16618929;plasma membrane:16602701;plasma membrane:12805588	plasma membrane
	AT1G47530.1	MATE efflux family protein;	peroxisome:10737809	vacuole:17151019	?
	AT1G67090.1*	ribulose bisphosphate carboxylase small chain 1A;	peroxisome:10737809;plastid:16299174;plastid:14688290	plasma membrane:22215637;plasma membrane:19334764;plastid:21539947;plastid:21531424;plastid:20423899;plastid:20061580;plastid:19288221;plastid:18633119;plastid:18431481;plastid:16923014;plastid:16648217;plastid:16207701;plastid:15322131;plastid:15028209;plastid:14729914;plastid:12938931;plastid:12766230;plastid:11826309;plastid:11719511	plastid
	AT1G76180.1	Dehydrin family protein;Encodes a dehydrin protein whose expression is induced early on in response to dehydration stress. This gene's expression to cold occurs in two waves, with early induction occurring within 1 h and secondary induction occurring 5 h after the beginning of cold stress. Expression is also induced in response to ABA but not in response to 2,4-D, BA, and GA3. ERD14 protein is ca…	peroxisome:10737809	cytosol:21166475;plasma membrane:22215637;plasma membrane:17317660;plastid:21531424;plastid:20061580;plastid:18431481;plastid:15028209;vacuole:18686298	?
	AT2G02510.1*	NADH dehydrogenase (ubiquinone)s;	peroxisome:19283443;mitochondrion:19283443;plastid:19283443	mitochondrion:21841088;mitochondrion:20197505;mitochondrion:18189341;mitochondrion:15276431	mitochondrion
	AT2G27020.1	20S proteasome alpha subunit G1;Encodes 20S proteasome alpha 7 subunit PAG1.	peroxisome:10737809	cytosol:21166475;nucleus:14617066;plasma membrane:19334764;vacuole:17151019;vacuole:15215502	?
	AT2G29990.1*	alternative NAD(P)H dehydrogenase 2;	peroxisome:18703057;mitochondrion:18703057;mitochondrion:18318686;mitochondrion:12972666	mitochondrion:21841088;unclear:16618929	peroxisome, mitochondrion
	AT2G38700.1	mevalonate diphosphate decarboxylase 1;Encodes mevalonate diphosphate decarboxylase, the enzyme that catalyzes the synthesis of isopentenyl diphosphate, used in sterol and isoprenoid biosynthesis. The protein appears to form a homodimeric complex. Incidentally, it was shown that the Arabidopsis MVD protein could also interact with its yeast homolog to form a heterodimer.	peroxisome:21655959	cytosol:21166475	?
	AT2G40360.1	Transducin/WD40 repeat-like superfamily protein;	peroxisome:10737809	plasma membrane:21433285	?
	AT2G42170.1	Actin family protein;	peroxisome:10737809	plasma membrane:19334764	?
	AT2G47320.1	Cyclophilin-like peptidyl-prolyl cis-trans isomerase family protein;	peroxisome:10737809	golgi:22430844	?
	AT3G02360.2	6-phosphogluconate dehydrogenase family protein;	peroxisome:18931141	cytosol:21166475;plasma membrane:19334764	peroxisome, cytosol
	AT3G02770.1	Ribonuclease E inhibitor RraA/Dimethylmenaquinone methyltransferase;	peroxisome:10737809	plasma membrane:22215637	?
	AT3G12050.1	Aha1 domain-containing protein;	peroxisome:10737809	cytosol:21166475;plasma membrane:19334764	?
	AT3G15450.1	Aluminium induced protein with YGL and LRDR motifs;	peroxisome:10737809	vacuole:18686298	?
	AT3G16460.1	Mannose-binding lectin superfamily protein;	peroxisome:10737809	mitochondrion:21296373;nucleus:14617066;plasma membrane:19334764	?
	AT3G21720.1	isocitrate lyase;Encodes a glyoxylate cycle enzyme isocitrate lyase (ICL).	peroxisome:10737809	plasma membrane:19334764	peroxisome
	AT3G26520.1*	tonoplast intrinsic protein 2;gamma tonoplast intrinsic protein 2 (TIP2). expressed throughout the plant and transcript level is increased upon NaCl or ABA treatments. NaCl stress-sensitive yeast mutant strains exhibit more resistance to salt when expressing this protein.	peroxisome:16236160;peroxisome:10737809;endoplasmic reticulum:19922653;endoplasmic reticulum:14576283;vacuole:19922653;vacuole:14576283	golgi:22430844;plasma membrane:22215637;plasma membrane:19334764;plasma membrane:15574830;plasma membrane:15060130;plasma membrane:12678916;plastid:20061580;plastid:18431481;vacuole:17151019;vacuole:15539469	?
	AT3G55040.1	glutathione transferase lambda 2;Encodes a member of the lambda family of glutathione transferases. It has thiol transferase activity and self S-glutathionylation activity in vitro.	peroxisome:19174456;cytosol:19174456	plastid:21531424;plastid:20423899;plastid:20061580;plastid:18633119;plastid:18431481;plastid:16207701	?
	AT3G55640.1	Mitochondrial substrate carrier family protein;	peroxisome:19036033;mitochondrion:19036033	plasma membrane:15308754;plasma membrane:14506206	peroxisome, mitochondrion
	AT3G57090.1*	Tetratricopeptide repeat (TPR)-like superfamily protein;Encodes a protein with similarity to yeast FIS proteins. These membrane anchored proteins bind DRP proteins and function during organelle division. FIS1B is expressed ubiquitously and appears to be involved in peroxisome division.	peroxisome:16545471;mitochondrion:16545471;plastid:16545471	plastid:20061580;plastid:18431481	?
	AT4G28220.1	NAD(P)H dehydrogenase B1;	peroxisome:18703057;mitochondrion:18703057;mitochondrion:12972666	plasma membrane:19334764	peroxisome, mitochondrion
	AT4G33200.1	myosin, putative;member of Myosin-like proteins	peroxisome:17500056;cytosol:19369591;nucleus:19369591	plasma membrane:19334764	dynamic
	AT4G33650.1	dynamin-related protein 3A;Encodes a protein with high sequence similarity to the dynamin superfamily. Among those members ADL2 was most closely related to Dnm1p of yeast and likely a member of the Vps1p subfamily. Widely expressed in various tissues with highest expression in flower tissues. Localizes to the chloroplast, mitochondrion and peroxisome. Involved in peroxisome and mitochondria fissi…	peroxisome:15086806;cytosol:18559960;mitochondrion:15086806;mitochondrion:14988495;plastid:9747851	plasma membrane:19334764	dynamic
	AT4G39660.1*	alanine:glyoxylate aminotransferase 2;alanine:glyoxylate aminotransferase 2 homolog (AGT2) mRNA,	peroxisome:19036033;mitochondrion:19036033	mitochondrion:21841088;mitochondrion:18385124;mitochondrion:14671022;mitochondrion:21472856;vacuole:17151019	peroxisome, mitochondrion
	AT5G04870.1	calcium dependent protein kinase 1;A calcium-dependent protein kinase that can phosphorylate phenylalanine ammonia lyase (PAL), a key enzyme in pathogen defense.	peroxisome:12913141	cytosol:20374526	?
	AT5G20490.1	Myosin family protein with Dil domain;Encodes a member of the type XI myosin protein family involved in root hair growth, trichome development, and organelle trafficking. This gene appears to be expressed at low levels throughout the plant.	peroxisome:17500056;cytosol:19369591	plasma membrane:19334764	dynamic
	AT5G20720.1*	chaperonin 20;Encodes a chloroplast co-chaperonin with similarity to CPN21 from spinach, E.coli GroES.	peroxisome:10737809;plastid:19036033	mitochondrion:21841088;mitochondrion:18385124;plastid:21539947;plastid:21531424;plastid:20423899;plastid:20061580;plastid:18633119;plastid:18431481;plastid:16207701;plastid:15028209;plastid:14729914;plastid:12938931;plastid:11826309	plastid
	AT5G22060.1	DNAJ homologue 2;Co-chaperonin similar to E. coli DnaJ	peroxisome:10737809	cytosol:21166475;plasma membrane:22318864;plasma membrane:19334764;plasma membrane:17317660	?
	AT5G24400.1*	NagB/RpiA/CoA transferase-like superfamily protein;Encodes a protein with 6-phosphoglucunolactonase activity that localizes to the chloroplasts and the peroxisome. However, mutant phenotypes observed in pgl3 mutant plants can be complemented with a chloroplast-targeted version of the protein. PGL3 likely functions in the oxidative branch of the pentose phosphate pathway. pgl3 mutant phenotypes su…	peroxisome:17951448;plastid:17951448	plastid:21531424;plastid:20423899;plastid:20061580;plastid:18633119;plastid:18431481	peroxisome, plastid
	AT5G40730.1	arabinogalactan protein 24;Encodes an arabinogalactan-protein (AGP24).	peroxisome:10737809	extracellular:16356755	?
	AT5G65660.1	hydroxyproline-rich glycoprotein family protein;	peroxisome:10737809	plasma membrane:17317660	?
