# Supplementary material for: Fluorescent protein tagging as a tool to define the subcellular distribution of proteins in plants
Source: Front Plant Sci. 2013 Jun 24;4:214. doi: 10.3389/fpls.2013.00214 (PMC3690342; doi:10.3389/fpls.2013.00214)
Supplement: Supplementary file 2 [file DataSheet2.XLSX]

## Sheet: Sheet1
Suppl. Table 2: List of proteins derived from SUBA3 that are claimed to be localized to the mitochondrion and plastid, the mitochondrion and peroxisome, or the peroxisome and plastid by FP tagging by the same or different literature reports. Colouring indicates known dual-targeted proteins (yellow), and proteins to be located in the mitochondrion only (orange) or in the plastid only (green) based…
	Gene	Description	Location FP tagging	Same publication (Y/N)
Mitochondrion	AT1G11870.1	Seryl-tRNA synthetase;Seryl-tRNA synthetase targeted to chloroplasts and mitochondria. Its inactivation causes developmental arrest of chloroplasts and mitochondria in Nicotiana benthamiana.	mitochondrion:16251277;mitochondrion:16107332;plastid:16251277;plastid:16107332	Y
and	AT1G13900.1	Purple acid phosphatases superfamily protein;	mitochondrion:22751362;plastid:22751362	Y
plastid	AT1G14270.1	CAAX amino terminal protease family protein;	mitochondrion:19224954;plastid:19224954	Y
	AT1G15390.1	peptide deformylase 1A;encodes a peptide deformylase-like protein. Removes N-formyl groups, a prerequisite for the action of methionine aminopeptidase during protein synthesis. Targeted to mitochondria. Requires Zn for catalysis.	mitochondrion:http://dx.doi.org/10.1016/S0168-9452(03)00236-X;mitochondrion:11060042;plastid:http://dx.doi.org/10.1016/S0168-9452(03)00236-X	Y
	AT1G21400.1	Thiamin diphosphate-binding fold (THDP-binding) superfamily protein;	mitochondrion:19995732;plastid:19995732	Y
	AT1G30680.1	toprim domain-containing protein;	mitochondrion:19036033;plastid:19036033	Y
	AT1G34470.1	Protein of unknown function (DUF803);	mitochondrion:21515817;plastid:21515817	Y
	AT1G49630.1	presequence protease 2;Zinc metalloprotease pitrilysin subfamily A. Signal peptide degrading enzyme targeted to mitochondria and chloroplasts. Expressed in flower, leaf and root. Not expressed in silique and shoot.	mitochondrion:15827031;plastid:15827031	Y
	AT1G50200.1	Alanyl-tRNA synthetase;	mitochondrion:16251277;plastid:16251277	Y
	AT1G50840.1	polymerase gamma 2;DNA Polymerase gamma2. Dual targeting to mitochondria and plastids due to alternative translation initiation.	mitochondrion:19036033;plastid:19036033;plastid:15993837;plastid:12837951	Y
	AT1G52080.1	actin binding protein family;unknown function	mitochondrion:21515817;plastid:21515817	Y
	AT1G63940.1	monodehydroascorbate reductase 6;	mitochondrion:12954611;plastid:12954611	Y
	AT1G63940.4	monodehydroascorbate reductase 6;	mitochondrion:12954611;plastid:12954611	Y
	AT1G64310.1	Tetratricopeptide repeat (TPR)-like superfamily protein;	mitochondrion:cpeb-tanz;plastid:cpeb-tanz	Y
	AT1G65420.1	Protein of unknown function (DUF565);Chloroplast localized YCF20-like gene involved in nonphotochemical quenching. Has overlapping functions with npq6.	mitochondrion:19224954;plastid:19224954	Y
	AT1G65630.1	DegP protease 3;Encodes a putative DegP protease.	mitochondrion:cpeb-tanz;plastid:cpeb-tanz	Y
	AT1G74130.1	Rhomboid-related intramembrane serine protease family protein;	mitochondrion:cpeb-tanz;plastid:cpeb-tanz	Y
	AT1G74260.1	purine biosynthesis 4;Encodes formylglycinamidine ribonucleotide synthase an enzyme involved in de novo purine biosynthesis. PUR4 is localizes to the chloroplast and mitochondria. Loss of PUR4 function affects male but not female gametophyte development.	mitochondrion:18441219;plastid:18441219	Y
	AT1G74600.1	pentatricopeptide (PPR) repeat-containing protein;	mitochondrion:cpeb-tanz;plastid:cpeb-tanz	Y
	AT1G78620.1	Protein of unknown function DUF92, transmembrane;	mitochondrion:19224954;plastid:19224954	Y
	AT2G02510.1	NADH dehydrogenase (ubiquinone)s;	mitochondrion:19283443;plastid:19283443;peroxisome:19283443	Y
	AT2G04842.1	threonyl-tRNA synthetase, putative / threonine--tRNA ligase, putative;Encodes a dual localized threonyl-tRNA synthetase found both in the mitochondrion and the chloroplast. Plants mutated in this gene terminate as embryos in the globular stage.	mitochondrion:19733576;mitochondrion:16251277;plastid:19733576;plastid:16251277	Y
	AT2G05710.1	aconitase 3;Encodes an aconitase that can catalyze the conversion of citrate to isocitrate through a cis-aconitate intermediate, indicating that it may participate in the TCA cycle and other primary metabolic pathways. The protein is believed to accumulate in the mitochondria and the cytosol. It affects CSD2 (At2g28190 - a superoxide dismutase) transcript levels and may play a role in the respons…	mitochondrion:cpeb-tanz;plastid:cpeb-tanz	Y
	AT2G15690.1	Tetratricopeptide repeat (TPR)-like superfamily protein;	mitochondrion:cpeb-tanz;plastid:cpeb-tanz	Y
	AT2G25840.1	Nucleotidylyl transferase superfamily protein;	mitochondrion:16251277;plastid:16251277	Y
	AT2G31170.1	Cysteinyl-tRNA synthetase, class Ia family protein;	mitochondrion:10824085;plastid:10824085	Y
	AT2G34630.1	geranyl diphosphate synthase 1;Encodes a geranyl diphosphate synthase. RNAi lines are dwarf. T-DNA knock-out lines are embryo lethal.	mitochondrion:21950843;plastid:21950843	Y
	AT2G35605.1	SWIB/MDM2 domain superfamily protein;	mitochondrion:22797472;plastid:22797472	Y
	AT2G39290.1	phosphatidylglycerolphosphate synthase 1;Encodes a phosphatidylglycerolphosphate synthase 2C which is dual-targeted into chloroplasts and mitochondria. Mutant plants have mutant chloroplasts but normal mitochondria.	mitochondrion:12609031;plastid:12609031	Y
	AT2G47770.1	TSPO(outer membrane tryptophan-rich sensory protein)-related;Encodes a membrane-bound protein designated AtTSPO (Arabidopsis thaliana TSPO-related). AtTSPO is related to the bacterial outer membrane tryptophan-rich sensory protein (TspO) and the mammalian mitochondrial 18 kDa Translocator Protein (18 kDa TSPO), members of the TspO/MBR domain-containing membrane proteins. Mainly detected in dry se…	mitochondrion:21689410;plastid:21689410;endoplasmic reticulum:21689410;endoplasmic reticulum:20847098;endoplasmic reticulum:19548979;golgi:20847098;golgi:19548979	Y
	AT3G02330.1	Pentatricopeptide repeat (PPR) superfamily protein;	mitochondrion:cpeb-tanz;plastid:cpeb-tanz	Y
	AT3G02660.1	Tyrosyl-tRNA synthetase, class Ib, bacterial/mitochondrial;	mitochondrion:19733576;mitochondrion:16251277;plastid:19733576;plastid:16251277	Y
	AT3G02780.1	isopentenyl pyrophosphate:dimethylallyl pyrophosphate isomerase 2;Encodes a protein with isopentenyl diphosphate:dimethylallyl diphosphate isomerase activity. There is genetic evidence that it functions in the mevalonate, but not the MEP biosynthetic pathway.	mitochondrion:cpeb-tanz;plastid:cpeb-tanz	Y
	AT3G03380.1	DegP protease 7;Encodes a putative DegP protease.	mitochondrion:cpeb-tanz;plastid:20089771;nucleus:cpeb-tanz	Y
	AT3G05790.1	lon protease 4;Encodes a member of the Lon protease-like proteins (Lon1/At5g26860, Lon2/At5g47040, Lon3/At3g05780, Lon4/At3g05790). Lon is a multifunctional ATP-dependent protease which exists in bacteria, archaea and within organelles in eukaryotic cells. Lon proteases are responsible for the degradation of abnormal, damaged and unstable proteins.	mitochondrion:cpeb-tanz;mitochondrion:17478548;mitochondrion:16669775;plastid:cpeb-tanz;plastid:17478548;plastid:16669775	Y
	AT3G12370.1	Ribosomal protein L10 family protein;	mitochondrion:19934175;plastid:19934175	Y
	AT3G13490.1	Lysyl-tRNA synthetase, class II;Encodes a dual targeted lysyl-tRNA ligase that is found both in the mitochondrion and the chloroplast. Plants mutated in this gene exhibit an ovule abortion phenotype.	mitochondrion:19733576;mitochondrion:16251277;plastid:19733576;plastid:16251277	Y
	AT3G15000.1	cobalt ion binding;	mitochondrion:22566615;mitochondrion:17666025;plastid:22566615	Y
	AT3G15130.1	Tetratricopeptide repeat (TPR)-like superfamily protein;	mitochondrion:cpeb-tanz;plastid:cpeb-tanz	Y
	AT3G19170.1	presequence protease 1;Zinc metalloprotease pitrilysin subfamily A. Signal peptide degrading enzyme targeted to mitochondria and chloroplasts. Expressed only in siliques and flowers	mitochondrion:14578924;plastid:14578924	Y
	AT3G20540.1	polymerase gamma 1;	mitochondrion:19036033;mitochondrion:12837951;plastid:19036033;plastid:15993837;plastid:12837951	Y
	AT3G25740.1	methionine aminopeptidase 1C;Encodes a plastid localized methionine aminopeptidase. Formerly called MAP1C, now called MAP1B.	mitochondrion:11060042;plastid:11060042	Y
	AT3G46100.1	Histidyl-tRNA synthetase 1;histidyl-tRNA synthetase	mitochondrion:9684861;plastid:9684861	Y
	AT3G48110.1	glycine-tRNA ligases;glycine-tRNA ligase	mitochondrion:11278923;plastid:11278923	Y
	AT3G54510.1	Early-responsive to dehydration stress protein (ERD4);	mitochondrion:21515817;plastid:21515817;endoplasmic reticulum:21515817	Y
	AT3G55400.1	methionyl-tRNA synthetase / methionine--tRNA ligase / MetRS (cpMetRS);	mitochondrion:9724821;plastid:9724821	Y
	AT3G56830.1	Protein of unknown function (DUF565);Similar in sequence to NPQ6 and NPQ7, but loss of function mutant does not exhibit a nonphotochemical quenching phenotype.	mitochondrion:19224954;plastid:19224954	Y
	AT3G57090.1	Tetratricopeptide repeat (TPR)-like superfamily protein;Encodes a protein with similarity to yeast FIS proteins. These membrane anchored proteins bind DRP proteins and function during organelle division. FIS1B is expressed ubiquitously and appears to be involved in peroxisome division.	mitochondrion:16545471;plastid:16545471;peroxisome:16545471	Y
	AT3G58140.1	phenylalanyl-tRNA synthetase class IIc family protein;	mitochondrion:16251277;plastid:16251277	Y
	AT4G04370.1	Tetratricopeptide repeat (TPR)-like superfamily protein;	mitochondrion:cpeb-tanz;plastid:cpeb-tanz	Y
	AT4G17300.1	Class II aminoacyl-tRNA and biotin synthetases superfamily protein;Asparaginyl-tRNA synthetase protein involved in amino acid activation/protein synthesis.	mitochondrion:10824085;plastid:10824085	Y
	AT4G21170.1	Tetratricopeptide repeat (TPR)-like superfamily protein;	mitochondrion:21908688;plastid:21908688	Y
	AT4G25200.1	mitochondrion-localized small heat shock protein 23.6;AtHSP23.6-mito mRNA, nuclear gene encoding mitochondrial	mitochondrion:cpeb-tanz;mitochondrion:19995732;plastid:19995732	Y
	AT4G26970.1	aconitase 2;Encodes an aconitase that can catalyze the conversion of citrate to isocitrate through a cis-aconitate intermediate, indicating that it may participate in the TCA cycle and other primary metabolic pathways. The protein is believed to accumulate in the mitochondria and the cytosol. It affects CSD2 (At2g28190 - a superoxide dismutase) transcript levels and may play a role in the respons…	mitochondrion:cpeb-tanz;plastid:cpeb-tanz	Y
	AT4G30490.1	AFG1-like ATPase family protein;	mitochondrion:19995732;plastid:19995732	Y
	AT4G31210.1	DNA topoisomerase, type IA, core;	mitochondrion:19036033;plastid:19036033	Y
	AT4G32400.1	Mitochondrial substrate carrier family protein;Encodes a plastidial nucleotide uniport carrier protein required to export newly synthesized adenylates into the cytosol.	mitochondrion:21330298;plastid:21330298	Y
	AT4G33170.1	Tetratricopeptide repeat (TPR)-like superfamily protein;	mitochondrion:cpeb-tanz;plastid:cpeb-tanz	Y
	AT4G33760.1	tRNA synthetase class II (D, K and N) family protein;	mitochondrion:19733576;mitochondrion:16251277;plastid:19733576;plastid:16251277	Y
	AT4G36580.1	AAA-type ATPase family protein;	mitochondrion:19995732;plastid:19995732	Y
	AT4G37040.1	methionine aminopeptidase 1D;encodes a methionine aminopeptidase	mitochondrion:11060042;plastid:11060042	Y
	AT5G03800.1	Pentatricopeptide repeat (PPR) superfamily protein;Encodes a protein with a large central domain of 14 internal pentatricopeptide motifs (some degenerate) arranged in tandem. Mutations in this locus result in embryo lethality.	mitochondrion:cpeb-tanz;plastid:cpeb-tanz	Y
	AT5G04140.1	glutamate synthase 1;Encodes a gene whose sequence is similar to ferredoxin dependent glutamate synthase (Fd-GOGAT). Expression in leaves is induced by light and sucrose. Proposed to be involved in photorespiration and nitrogen assimilation.	mitochondrion:19223513;plastid:19223513	Y
	AT5G06540.1	Pentatricopeptide repeat (PPR) superfamily protein;	mitochondrion:cpeb-tanz;plastid:cpeb-tanz	Y
	AT5G06810.1	Mitochondrial transcription termination factor family protein;	mitochondrion:21908688;mitochondrion:21464319;plastid:21908688	Y
	AT5G08710.1	Regulator of chromosome condensation (RCC1) family protein;	mitochondrion:19036033;plastid:19036033	Y
	AT5G08740.1	NAD(P)H dehydrogenase C1;	mitochondrion:19036033;mitochondrion:18703057;mitochondrion:12972666;plastid:19036033;plastid:18703057	Y
	AT5G14660.1	peptide deformylase 1B;Encodes a peptide deformylase PDF1B. The crystal structure has been determined at a resolution of 0.24 nm (Biochem J, 2008, vol 413:417-427).	mitochondrion:http://dx.doi.org/10.1016/S0168-9452(03)00236-X;mitochondrion:11060042;plastid:http://dx.doi.org/10.1016/S0168-9452(03)00236-X;plastid:11060042	Y
	AT5G15700.1	DNA/RNA polymerases superfamily protein;Nucleus encoded plastid RNA polymerase. Localized in mitochondria and chloroplast.	mitochondrion:15834007;mitochondrion:11258484;plastid:11258484	Y
	AT5G16200.1	50S ribosomal protein-related;	mitochondrion:19995732;plastid:19995732	Y
	AT5G16715.1	ATP binding;valine-tRNA ligases;aminoacyl-tRNA ligases;nucleotide binding;ATP binding;aminoacyl-tRNA ligases;	mitochondrion:19733576;mitochondrion:16251277;plastid:19733576	Y
	AT5G17660.1	tRNA (guanine-N-7) methyltransferase;	mitochondrion:19224954;plastid:19224954	Y
	AT5G22800.1	Alanyl-tRNA synthetase, class IIc;A locus involved in embryogenesis. Mutations in this locus result in embryo lethality.	mitochondrion:16251277;plastid:16251277	Y
	AT5G23060.1	calcium sensing receptor;Encodes a chloroplast-localized protein that modulates cytoplasmic Ca2+ concentration and is crucial for proper stomatal regulation in response to elevations of external Ca2+.	mitochondrion:19036033;plastid:19036033;plastid:18507772;plastid:18331354;plastid:18088326;plasma membrane:12968184	Y
	AT5G24120.1	sigma factor E;Encodes a specialized sigma factor that functions in regulation of plastid genes and is responsible for the light-dependent transcription at the psbD LRP. Activation of SIG5 is dependent upon blue light and mediated by cryptochromes.	mitochondrion:12805603;plastid:12805603	Y
	AT5G24850.1	cryptochrome 3;Binds flavin adenine dinucleotide and DNA. It does not have photolyase activity, and it is likely to act as photoreceptor. Closely related to Synechocystis cryptochrome.	mitochondrion:12834405;plastid:12834405	Y
	AT5G27110.1	Tetratricopeptide repeat (TPR)-like superfamily protein;	mitochondrion:cpeb-tanz;plastid:cpeb-tanz	Y
	AT5G35630.1	glutamine synthetase 2;chloroplastic glutamine synthetase	mitochondrion:15273293;plastid:15273293	Y
	AT5G36950.1	DegP protease 10;Encodes a putative DegP protease.	mitochondrion:cpeb-tanz;plastid:cpeb-tanz	Y
	AT5G38710.1	Methylenetetrahydrofolate reductase family protein;	mitochondrion:19995732;plastid:19995732	Y
	AT5G39680.1	Pentatricopeptide repeat (PPR) superfamily protein;	mitochondrion:cpeb-tanz;plastid:cpeb-tanz	Y
	AT5G43050.1	Protein of unknown function (DUF565);Chloroplast localized YCF20-like gene involved in nonphotochemical quenching. Has overlapping functions with npq7	mitochondrion:19224954;plastid:19224954	Y
	AT5G49030.1	tRNA synthetase class I (I, L, M and V) family protein;	mitochondrion:19733576;plastid:19733576;plastid:16251277	Y
	AT5G50240.1	protein-l-isoaspartate methyltransferase 2;L-isoaspartyl methyltransferase 2 (PIMT2)gene, alternatively spliced.	mitochondrion:18318686;plastid:18318686;nucleus:18318686;nucleus:15347786;cytoskeleton:18318686;cytosol:18318686;endoplasmic reticulum:18318686	Y
	AT5G51440.1	HSP20-like chaperones superfamily protein;	mitochondrion:cpeb-tanz;mitochondrion:19995732;plastid:19995732	Y
	AT5G52520.1	Class II aaRS and biotin synthetases superfamily protein;	mitochondrion:19733576;mitochondrion:16251277;plastid:19733576;plastid:16251277	Y
	AT5G52970.1	thylakoid lumen 15.0 kDa protein;	mitochondrion:19224954;plastid:19224954	Y
	AT5G54770.1	thiazole biosynthetic enzyme, chloroplast (ARA6) (THI1) (THI4);Encodes a thiamine biosynthetic gene that has a dual function in thiamine biosynthesis and mitochondrial DNA damage tolerance. It appears to be involved in producing the thiazole portion of thiamine (vitamin B1). A crystal structure of the protein reveals that it forms a 2-ring homo-octamer.	mitochondrion:12482914;plastid:12482914	Y
	AT5G55200.1	Co-chaperone GrpE family protein;	mitochondrion:19995732;plastid:19995732	Y
	AT5G56940.1	Ribosomal protein S16 family protein;	mitochondrion:cpeb-tanz;mitochondrion:18453549;plastid:cpeb-tanz;plastid:18453549	Y
	AT5G63980.1	Inositol monophosphatase family protein;Encodes a bifunctional protein that has 3'(2'),5'-bisphosphate nucleotidase and inositol polyphosphate 1-phosphatase activities and rescues sulfur assimilation mutants in yeast. It is involved in the response to cold, drought (negative regulator of drought tolerance), and ABA. Mutants in this gene exhibit enhanced induction of stress genes in response to co…	mitochondrion:22128124;plastid:22128124	Y
	AT5G64050.1	glutamate tRNA synthetase;Glutamate-tRNA ligase. Targeted to mitochondria and chloroplast. Its inactivation causes developmental arrest of chloroplasts and mitochondria in Nicotiana benthamiana.	mitochondrion:16251277;mitochondrion:16107332;plastid:16251277;plastid:16107332	Y
	AT1G59720.1	Tetratricopeptide repeat (TPR)-like superfamily protein;Pentatricopeptide Repeat Protein containing the DYW motif. Required for editing of multiple plastid transcripts. Endonuclease activity.	mitochondrion:15269332;plastid:cpeb-tanz	N
	AT3G17970.1	translocon at the outer membrane of chloroplasts 64-III;Integral chloroplast outer membrane protein.	mitochondrion:12954611;plastid:21515817;plastid:14741350	N
	AT4G33650.1	dynamin-related protein 3A;Encodes a protein with high sequence similarity to the dynamin superfamily. Among those members ADL2 was most closely related to Dnm1p of yeast and likely a member of the Vps1p subfamily. Widely expressed in various tissues with highest expression in flower tissues. Localizes to the chloroplast, mitochondrion and peroxisome. Involved in peroxisome and mitochondria fissi…	mitochondrion:15086806;mitochondrion:14988495;plastid:9747851;cytosol:18559960;peroxisome:15086806	N
	AT4G39460.1	S-adenosylmethionine carrier 1;Encodes a plastid metabolite transporter required for the import of S-Adenosylmethionine from the cytosol. Impaired function of SAMT1 led to decreased accumulation of prenyllipids and mainly affected the chlorophyll pathway.	mitochondrion:16950860;plastid:17098813	N
	AT5G23040.1	Protein of unknown function (DUF3353);Cell growth defect factor 1.Causes Bax mediated lethality in yeast by generating reactive oxygen species and this effect is suppressed by AtBI-1.	mitochondrion:16192270;plastid:19224954	N
	AT5G26860.1	lon protease 1;Encodes a member of the Lon protease-like proteins (Lon1/At5g26860, Lon2/At5g47040, Lon3/At3g05780, Lon4/At3g05790). Lon is a multifunctional ATP-dependent protease which exists in bacteria, archaea and within organelles in eukaryotic cells. Lon proteases are responsible for the degradation of abnormal, damaged and unstable proteins.	mitochondrion:19076295;mitochondrion:17478548;plastid:cpeb-tanz	N
	AT5G51020.1	crumpled leaf;Encodes CRL (CRUMPLED LEAF), a protein localized in the outer envelope membrane of plastids. Mutation in this gene affects the pattern of cell division, cell differentiation and plastid division.	mitochondrion:21515817;plastid:22014227;plastid:15086805	N
	AT5G55740.1	Tetratricopeptide repeat (TPR)-like superfamily protein;Encodes a member of the E+ subgroup of the PPR protein family, containing the E and E+ motifs following a tandem array of PPR motifs. It also contains an unknown motif consisting of 15 aa, which is highly conserved in some PPR proteins, including CRR4. CRR21 is involved in RNA editing of the site 2 of ndhD (ndhD-2),which encodes a subunit of…	mitochondrion:15269332;plastid:cpeb-tanz	N
Mitochondrion	AT1G07180.1	alternative NAD(P)H dehydrogenase 1;Internal NAD(P)H dehydrogenase in mitochondria. The predicted protein sequence has high homology with other designated NAD(P)H DHs from microorganisms; the capacity for matrix NAD(P)H oxidation via the rotenone-insensitive pathway is significantly reduced in the Atndi1 mutant plant line; the in vitro translation product of AtNDI1 is imported into isolated mitoc…	mitochondrion:18703057;mitochondrion:12972666;peroxisome:18703057	Y
and	AT2G02510.1	NADH dehydrogenase (ubiquinone)s;	mitochondrion:19283443;peroxisome:19283443;plastid:19283443	Y
peroxisome	AT2G29990.1	alternative NAD(P)H dehydrogenase 2;	mitochondrion:18703057;mitochondrion:18318686;mitochondrion:12972666;peroxisome:18703057	Y
	AT3G55640.1	Mitochondrial substrate carrier family protein;	mitochondrion:19036033;peroxisome:19036033	Y
	AT3G57090.1	Tetratricopeptide repeat (TPR)-like superfamily protein;Encodes a protein with similarity to yeast FIS proteins. These membrane anchored proteins bind DRP proteins and function during organelle division. FIS1B is expressed ubiquitously and appears to be involved in peroxisome division.	mitochondrion:16545471;peroxisome:16545471;plastid:16545471	Y
	AT4G04320.1	malonyl-CoA decarboxylase family protein;	mitochondrion:19036033;peroxisome:19329564;peroxisome:19036033	Y
	AT4G28220.1	NAD(P)H dehydrogenase B1;	mitochondrion:18703057;mitochondrion:12972666;peroxisome:18703057	Y
	AT4G33650.1	dynamin-related protein 3A;Encodes a protein with high sequence similarity to the dynamin superfamily. Among those members ADL2 was most closely related to Dnm1p of yeast and likely a member of the Vps1p subfamily. Widely expressed in various tissues with highest expression in flower tissues. Localizes to the chloroplast, mitochondrion and peroxisome. Involved in peroxisome and mitochondria fissi…	mitochondrion:15086806;mitochondrion:14988495;peroxisome:15086806;cytosol:18559960;plastid:9747851	Y
	AT4G39660.1	alanine:glyoxylate aminotransferase 2;alanine:glyoxylate aminotransferase 2 homolog (AGT2) mRNA,	mitochondrion:19036033;peroxisome:19036033	Y
	AT5G23395.1	Cox19-like CHCH family protein;	mitochondrion:20829360;peroxisome:20829360	Y
Peroxisome	AT2G02510.1	NADH dehydrogenase (ubiquinone)s;	peroxisome:19283443;plastid:19283443;mitochondrion:19283443	Y
and	AT2G45130.1	SPX domain gene 3;	peroxisome:18315545;plastid:18315545	Y
plastid	AT3G56490.1	HIS triad family protein 3;Encodes a protein that has adenylylsulfate sulfohydrolase activity (E.C. 3.6.2.1) in vitro.	peroxisome:19329564;plastid:19329564	Y
	AT3G57090.1	Tetratricopeptide repeat (TPR)-like superfamily protein;Encodes a protein with similarity to yeast FIS proteins. These membrane anchored proteins bind DRP proteins and function during organelle division. FIS1B is expressed ubiquitously and appears to be involved in peroxisome division.	peroxisome:16545471;plastid:16545471;mitochondrion:16545471	Y
	AT5G24400.1	NagB/RpiA/CoA transferase-like superfamily protein;Encodes a protein with 6-phosphoglucunolactonase activity that localizes to the chloroplasts and the peroxisome. However, mutant phenotypes observed in pgl3 mutant plants can be complemented with a chloroplast-targeted version of the protein. PGL3 likely functions in the oxidative branch of the pentose phosphate pathway. pgl3 mutant phenotypes su…	peroxisome:17951448;plastid:17951448	Y
	AT1G67090.1	ribulose bisphosphate carboxylase small chain 1A;	peroxisome:10737809;plastid:16299174;plastid:14688290	N
	AT4G33650.1	dynamin-related protein 3A;Encodes a protein with high sequence similarity to the dynamin superfamily. Among those members ADL2 was most closely related to Dnm1p of yeast and likely a member of the Vps1p subfamily. Widely expressed in various tissues with highest expression in flower tissues. Localizes to the chloroplast, mitochondrion and peroxisome. Involved in peroxisome and mitochondria fissi…	peroxisome:15086806;plastid:9747851;cytosol:18559960;mitochondrion:15086806;mitochondrion:14988495	N
	AT5G20720.1	chaperonin 20;Encodes a chloroplast co-chaperonin with similarity to CPN21 from spinach, E.coli GroES.	peroxisome:10737809;plastid:19036033	N
